# Supplementary material for: Spontaneous Tl(i)-to-Tl(iii) oxidation in dynamic heterobimetallic Hg(ii)/Tl(i) porphyrin complexes
Source: Royal Society of Chemistry journal article supplement (doi:10.1039/c5cc07828h), 2015-10-30
Supplement: c5cc07828h1.pdf [file c5cc07828h1.pdf]

## Supporting Information

### Spontaneous Tl(I)-to-Tl(III) Oxidation in Dynamic Heterobimetallic Hg(II)/Tl(I) Porphyrin Complexes

Victoria Ndoym, <sup>a</sup> Luca Fusaro, <sup>b</sup> Thierry Roisnel, <sup>a</sup> Stéphane Le Gac\*<sup>a</sup> and Bernard Boitrel\*<sup>a</sup>

(a) UMR CNRS 6226, Institut des Sciences Chimiques de Rennes, Université de Rennes 1, 263 avenue du Général Leclerc, 35042 Rennes cedex, France.

E-mail : stephane.legac@univ-rennes1.fr; bernard.boitrel@univ-rennes1.fr

(b) Unité de Chimie des Nanomatériaux (CNANO), Université de Namur, 61 rue de Bruxelles, B-5000 Namur, Belgium.

#### Content:

#### Experimental Section

##### General

##### <sup>205</sup>Tl Heteronuclear NMR experiments

General procedure for the formation of complexes **1**<sup>Hg</sup>, **1**<sup>Hg</sup><sub>Tl(I)</sub>, **2**<sup>Hg</sup> and **2**<sup>Hg</sup><sub>Tl(I)</sub>

Characterization of complexes **1**<sup>Hg</sup>, **2**<sup>Hg</sup>, **1**<sup>Hg</sup><sub>Tl(I)</sub>, **1**<sup>Tl(III)</sup> and **2**<sup>Hg</sup><sub>Tl(I)</sub>

Crystal data for complex **1**<sup>Tl(III)</sup>

**Figure S1.** 2D COSY and HSQC NMR spectra of **1**<sup>Hg</sup>

**Figure S2.** 2D COSY NMR spectrum of **1**<sup>Tl(III)</sup>

**Figure S3.** 2D HSQC NMR spectrum of **1**<sup>Tl(III)</sup>

**Figure S4.** 2D COSY NMR spectrum of **1**<sup>Hg</sup><sub>Tl(I)</sub>

**Figure S5.** 2D HSQC NMR spectrum of **1**<sup>Hg</sup><sub>Tl(I)</sub>

**Figure S6.** 2D COSY NMR spectrum of **2**<sup>Hg</sup><sub>Tl(I)</sub>

**Figure S7.** 2D HSQC NMR spectrum of **2**<sup>Hg</sup><sub>Tl(I)</sub>

**Figure S8.** Comparison of the variable temperature <sup>1</sup>H NMR profiles of **2**<sub>Tl(III)</sub>·**Tl(I)** and **2**<sup>Hg</sup><sub>Tl(I)</sub>

**Figure S9.** Formation and spontaneous evolution of **2**<sup>Hg</sup><sub>Tl(I)</sub> monitored by <sup>1</sup>H and <sup>205</sup>Tl NMR spectroscopy

**Figure S10.** Influence of the order of introduction of TlOAc and Hg(OAc)<sub>2</sub> on the formation of **1**<sup>Hg</sup><sub>Tl(I)</sub> monitored by <sup>1</sup>H NMR spectroscopy

**Figure S11.** Influence of the order of introduction of TlOAc and Hg(OAc)<sub>2</sub> on the formation of **2**<sup>Hg</sup><sub>Tl(I)</sub> monitored by <sup>1</sup>H NMR spectroscopy

**Figure S12.**  $^1\text{H}$  NMR monitoring of the spontaneous transformation  $1^{\text{Hg}}_{\text{Tl(I)}} \rightarrow 1^{\text{Tl(III)}}$  in the presence of DMAP

**Figure S13.**  $^1\text{H}$  NMR monitoring of the spontaneous transformation  $2^{\text{Hg}}_{\text{Tl(I)}} \rightarrow 2_{\text{Tl(III)}} \cdot \text{Tl(I)}$  without or with DMAP

**Figure S14.**  $^1\text{H}$  NMR experiment related to the Tl(I)-to-Tl(III) oxidation process, attempted with an excess of  $\text{Hg}(\text{OAc})_2$

**Figure S15.**  $^1\text{H}$  NMR monitoring of the transformations  $1^{\text{Hg}}_{\text{Tl(I)}} \rightarrow 1^{\text{Tl(III)}}$  and  $2^{\text{Hg}}_{\text{Tl(I)}} \rightarrow 2_{\text{Tl(III)}} \cdot \text{Tl(I)}$  carried out at ambient atmosphere or in deoxygenated solvents

**Figure S16.**  $^1\text{H}$  NMR experiments related to the Tl(I)-to-Tl(III) oxidation process attempted without porphyrin

**Figure S17.** Monitoring of the metallation of **1** with  $\text{Hg(II)}$  and  $\text{Tl(I)}$  by UV-vis absorption spectroscopy

**Figure S18.** Monitoring of the metallation of **2** with  $\text{Hg(II)}$  and  $\text{Tl(I)}$  by UV-vis absorption spectroscopy

**Figure S19.** UV-vis absorption spectra of  $1^{\text{Hg}}_{\text{Tl(I)}}$  and  $2^{\text{Hg}}_{\text{Tl(I)}}$  obtained from a 1/500 dilution of NMR tube solutions

## Experimental Section

### General

All of the NMR experiments were conducted in 5 mm standard NMR tubes.  $^1\text{H}$  NMR spectra were recorded at 400 or 500 MHz. Chemical shifts are expressed in parts per million, and traces of residual solvents were used as internal standards. All of the  $^1\text{H}$  NMR signals were assigned using 2D NMR experiments (COSY, HSQC). Compounds **1**<sup>[1]</sup> and **2**<sup>[2]</sup> were prepared as previously described. All of the chemicals were commercial products and used as received. **Caution! Thallium salts are highly toxic and should be handled with care.**

### $^{205}\text{Tl}$ Heteronuclear NMR experiments

Natural abundance  $^{205}\text{Tl}$  and  $^1\text{H}$  NMR spectra were recorded at 25° C, on a Varian VNMR System spectrometer operating at 9.4 T (230.9 and 399.9 MHz, respectively) equipped with three channels (one high band and two low band) and temperature regulation, using a modified 5 mm switchable probe. The spectra of  $\text{Tl(I)}$  were recorded using the following acquisition parameters: spectral width of about 832 ppm (192 kHz), 0.06 s relaxation delay, 17  $\mu\text{s}$  (90°) excitation pulse, 5 ms acquisition time and a number of transients ranging between  $6.8 \times 10^3$  and  $8.7 \times 10^5$ . The spectra of  $\text{Tl(III)}$  were recorded using the following acquisition parameters: spectral width of about 832 ppm (192 kHz), 4.9 s relaxation delay, 90° excitation pulse, 0.1 s acquisition time and a number of transients ranging between  $3.0 \times 10^2$  and  $1.2 \times 10^4$ . The spectra were recorded lock-on without sample spinning. The processing comprised correction of the Free Induction Decay (FID) by backward linear prediction, exponential multiplication with a line broadening factor of 200 Hz, zero filling, Fourier transform, zero-order phase correction, and baseline correction. The chemical shift scale was calibrated at 25°C with respect to an aqueous  $\text{TlNO}_3$  solution at infinite dilution (0 ppm).<sup>[3]</sup>

### General procedure for the formation of complexes $\mathbf{1^{\text{Hg}}}$ , $\mathbf{1^{\text{Hg}}_{\text{Tl(I)}}$ , $\mathbf{2^{\text{Hg}}}$ and $\mathbf{2^{\text{Hg}}_{\text{Tl(I)}}$

The complexes  $\mathbf{1^{\text{Hg}}}$  and  $\mathbf{2^{\text{Hg}}}$  were prepared by mixing the free base porphyrins **1** or **2** (2.38  $\mu\text{mol}$ , 1 equiv.) in 500  $\mu\text{L}$  of 9:1 mixture of  $\text{CDCl}_3/\text{CD}_3\text{OD}$ , 4  $\mu\text{L}$  of DIPEA (23.8  $\mu\text{mol}$ , 10 equiv.) and 40  $\mu\text{L}$  (2.38  $\mu\text{mol}$ , 1 equiv.) of a stock solution of  $\text{Hg}(\text{OAc})_2$  (9.5 mg in 500  $\mu\text{L}$  of 9:1  $\text{CDCl}_3/\text{CD}_3\text{OD}$ ). In the case of  $\mathbf{2^{\text{Hg}}}$ ,<sup>[4]</sup> the formation of a bimetallic complex ( $\mathbf{2Hg_2}$ , structure in Figure S14) is also observed. Then the bimetallic complexes  $\mathbf{1^{\text{Hg}}_{\text{Tl(I)}}$  or  $\mathbf{2^{\text{Hg}}_{\text{Tl(I)}}$  were formed by adding 30  $\mu\text{L}$  (2.38  $\mu\text{mol}$ , 1 equiv.) of a stock solution of  $\text{TlOAc}$  (10.5 mg in 500  $\mu\text{L}$  of 9:1  $\text{CDCl}_3/\text{CD}_3\text{OD}$ ). The  $^1\text{H}$  NMR spectrum recorded at 298 K showed the quasi-quantitative formation of the desired complexes.

### Characterization of complexes $\mathbf{1^{\text{Hg}}}$ , $\mathbf{2^{\text{Hg}}}$ , $\mathbf{1^{\text{Hg}}_{\text{Tl(I)}}$ , $\mathbf{1^{\text{Tl(III)}}$ and $\mathbf{2^{\text{Hg}}_{\text{Tl(I)}}$

$\mathbf{1^{\text{Hg}}}$ :  $^1\text{H}$  NMR (400 MHz,  $\text{CDCl}_3/\text{CD}_3\text{OD}$  9:1, DIPEA, 298 K) :  $\delta$  8.94 (d,  $J$  = 8.2 Hz, 2H,  $\text{HAr}_{\text{meso}}$ ), 8.93 (d,  $J$  = 4.5 Hz, 2H,  $\text{H}_{\beta\text{pyr}}$ ), 8.76 (d,  $J$  = 4.5 Hz, 2H,  $\text{H}_{\beta\text{pyr}}$ ), 8.73 (d,  $J$  = 4.5 Hz, 2H,  $\text{H}_{\beta\text{pyr}}$ ), 8.62 (d,  $J$  = 4.5 Hz, 2H,  $\text{H}_{\beta\text{pyr}}$ ), 7.90 (d,  $J$  = 7.5 Hz, 2H,  $\text{HAr}_{\text{meso}}$ ), 7.79 (t,  $J$  = 8.0 Hz, 2H,  $\text{HAr}_{\text{meso}}$ ), 7.52 (s, 1H,  $\text{HAr}_{m\text{-OMe}}$ ), 7.44 (t,  $J$  = 8.0 Hz, 2H,  $\text{HAr}_{\text{meso}}$ ), 7.43 (d,  $J$  = 7.5 Hz, 2H,  $\text{HAr}_{\text{meso}}$ ), 7.38 (s, 1H,  $\text{HAr}_{m\text{-OMe}}$ ), 7.31 (s, 1H,  $\text{HAr}_{m\text{-OMe}}$ ), 6.98 (s, 1H,  $\text{HAr}_{m\text{-OMe}}$ ), 6.85 (t,  $J$  = 7.8 Hz, 2H,  $\text{HAr}_{\text{strap}}$ ), 6.82 (t,  $J$  = 2.3 Hz, 1H,  $\text{HAr}_{m\text{-OMe}}$ ), 6.76 (s, 1H,  $\text{HAr}_{m\text{-OMe}}$ ), 6.63 (d,  $J$  = 7.5 Hz, 2H,  $\text{HAr}_{\text{strap}}$ ), 5.19 (s, 2H,  $\text{HAr}_{\text{strap}}$ ), 3.91 (s, 3H,  $\text{CH}_3$ ), 3.90 (s, 3H,  $\text{CH}_3$ ), 3.88 (s, 3H,  $\text{CH}_3$ ), 3.78 (s, 3H,  $\text{CH}_3$ ), 1.80 (m, 2H,  $\text{CH}_{2,\text{benz}}$ ), 1.09 (m, 2H,  $\text{CH}_{2,\text{benz}}$ ), 0.82 (m, 1H,  $\text{CHCO}$ ). 2D HSQC NMR  $\delta(^{13}\text{C})$ : 134.3 (2C), 133.4 (2C), 132.0 (2C), 131.6 (2C), 131.3 (2C), 130.3 (2C), 129.3 (2C),

[1] S. Le Gac, B. Najjari, L. Fusaro, T. Roisnel, V. Dorcet, M. Luhmer, E. Furet, J.-F. Halet and B. Boitrel, *Chem. Commun.*, 2012, **48**, 3724-3726.

[2] Z. Halime, M. Lachkar, T. Roisnel, E. Furet, J.-F. Halet and B. Boitrel, *Angew. Chem. Int. Ed.*, 2007, **46**, 5120-5124.

[3] R. W. Briggs, K. R. Metz and J. F. Hinton, *Journal of Solution Chemistry*, 1979, **8**, 479-487.

[4] N. Motreff, S. Le Gac, M. Luhmer, E. Furet, J.-F. Halet, T. Roisnel and B. Boitrel, *Angew. Chem. Int. Ed.*, 2011, **50**, 1560-1564.

128.1 (2C), 126.0 (2C), 125.4 (2C), 122.6 (2C), 119.0 (2C), 115.0, 114.9, 114.4, 114.1, 99.7, 99.0, 55.5 (4C), 39.9 (2C) ppm. HRMS (ESI):  $m/z$  calculated 1255.33237  $[M]^-$  for  $C_{66}H_{49}N_6O_8^{202}Hg$ , found 1255.3326 (0 ppm).

**$2^{Hg}$** :  $^1H$  NMR (400 MHz,  $CDCl_3/CD_3OD$  9:1, DIPEA, 298 K):  $\delta$  8.92 (d,  $J$  = 8.4 Hz, 2H,  $H_{Ar_{meso}}$ ), 8.85 (d,  $J$  = 7.9 Hz, 2H,  $H_{Ar_{meso}}$ ), 8.79 (d,  $J$  = 4.5 Hz, 2H,  $H_{\beta_{pyr}}$ ), 8.75 (s, 2H,  $H_{\beta_{pyr}}$ ), 8.70 (d,  $J$  = 4.5 Hz, 2H,  $H_{\beta_{pyr}}$ ), 8.68 (s, 2H,  $H_{\beta_{pyr}}$ ), 8.24 (d,  $J$  = 7.4 Hz, 2H,  $H_{Ar_{meso}}$ ), 8.00 (d,  $J$  = 7.5 Hz, 2H,  $H_{Ar_{meso}}$ ), 7.80 – 7.73 (m, 4H,  $H_{Ar_{meso}}$ ), 7.48 – 7.42 (m, 4H,  $H_{Ar_{meso}}$ ), 7.39 (d,  $J$  = 7.5 Hz, 2H,  $H_{Ar_{strap}}$ ), 7.28 (d,  $J$  = 7.5 Hz, 2H,  $H_{Ar_{strap}}$ ), 6.88 (t,  $J$  = 7.5 Hz, 2H,  $H_{Ar_{strap}}$ ), 6.78 (t,  $J$  = 7.7 Hz, 2H,  $H_{Ar_{strap}}$ ), 6.74 (d,  $J$  = 8 Hz, 2H,  $H_{Ar_{strap}}$ ), 6.61 (d,  $J$  = 7.6 Hz, 2H,  $H_{Ar_{strap}}$ ), 5.32 (s, 2H,  $H_{Ar_{strap}}$ ), 5.02 (s, 2H,  $H_{Ar_{strap}}$ ), 1.53 (m, 6H,  $CH_2benz$  +  $CHCO$ ), 1.28 (m, 4H,  $CH_2benz$ ). HRMS (ESI):  $m/z$  calculated 1479.36686 for  $[M-H+Na]^+ C_{80}H_{54}N_8O_8Na^{202}Hg$ , found 1479.3681 (0 ppm).

**$1^{Hg}_{Ti(II)}$** :  $^1H$  NMR (500 MHz,  $CDCl_3/CD_3OD$  9:1, DIPEA, 298 K):  $\delta$  9.16 (d,  $J$  = 4.5 Hz, 2H,  $H_{\beta_{pyr}}$ ), 9.00 (d,  $J$  = 4.5 Hz, 2H,  $H_{\beta_{pyr}}$ ), 8.99 (d,  $J$  = 4.5 Hz, 2H,  $H_{\beta_{pyr}}$ ), 8.94 (d,  $J$  = 7.4 Hz, 2H,  $H_{Ar_{meso}}$ ), 8.86 (d,  $J$  = 4.6 Hz, 2H,  $H_{\beta_{pyr}}$ ), 7.99 (d,  $J$  = 7.4 Hz, 2H,  $H_{Ar_{meso}}$ ), 7.90 (s, 1H,  $H_{Ar_{m-OMe}}$ ), 7.84 (td,  $J$  = 7.9, 1.6 Hz, 2H,  $H_{Ar_{meso}}$ ), 7.50 (td,  $J$  = 8.8, 1.6 Hz, 2H,  $H_{Ar_{meso}}$ ), 7.49 (s, 1H,  $H_{Ar_{m-OMe}}$ ), 7.41 (d,  $J$  = 8.0 Hz, 2H,  $H_{Ar_{strap}}$ ), 7.36 (s, 1H,  $H_{Ar_{m-OMe}}$ ), 7.29 (s, 1H,  $H_{Ar_{m-OMe}}$ ), 7.25 (s, 1H,  $H_{Ar_{m-OMe}}$ ), 6.89 (t,  $J$  = 7.6 Hz, 2H,  $H_{Ar_{strap}}$ ), 6.87 (t,  $J$  = 2.2 Hz, 1H,  $H_{Ar_{m-OMe}}$ ), 6.78 (t,  $J$  = 2.2 Hz, 1H,  $H_{Ar_{m-OMe}}$ ), 6.61 (d,  $J$  = 7.6 Hz, 2H,  $H_{Ar_{strap}}$ ), 5.10 (s, 2H,  $H_{Ar_{strap}}$ ), 3.95 (s, 3H,  $CH_3$ ), 3.87(3) (s, 3H,  $CH_3$ ), 3.87(1) (s, 3H,  $CH_3$ ), 3.77 (s, 3H,  $CH_3$ ), 1.95 (d,  $J$  = 12.2 Hz, 2H,  $CH_{2,benz}$ ), 1.22 (m, 2H,  $CH_{2,benz}$ ), 0.92 (m, 1H,  $CHCO$ ).  $^{205}Ti$  NMR (231 MHz,  $CDCl_3/CD_3OD$  9:1, DIPEA, 298 K):  $\delta$  1114 ppm. 2D HSQC NMR ( $\delta(^{13}C)$ ): 134.8 (2C), 134.4 (2C), 133.6 (2C), 132.6 (2C), 131.9 (2C), 131.5 (2C), 129.5 (2C), 128.3 (2C), 126.2 (2C), 124.3 (2C), 122.8 (2C), 120.3 (2C), 114.3, 114.2, 114.0, 113.7, 100.1, 99.8, 55.4 (4C), 40.3 (2C) ppm. UV-vis ( $CHCl_3/CH_3OH$  9:1, DIPEA):  $\lambda$  461, 586, 632 nm. HRMS (ESI):  $m/z$  calculated 1459.29896 for  $[M-H]^+ C_{66}H_{48}N_6O_8^{202}Hg^{205}Ti$ , found 1459.2999 (1 ppm) ( $1^{Hg}_{Ti(II)}$  is observed with a weak intensity, ca. 5-10% vs. the mononuclear  $Hg(II)$  complex  $1^{Hg}$ , likely as a result of a demetallation process occurring during the mass analysis).

**$1^{Ti(III)}$** :  $^1H$  NMR (500 MHz,  $CDCl_3/CD_3OD$  9:1, DIPEA, 298 K):  $\delta$  9.15 (dd,  $J$  = 63, 4.7 Hz, 2H,  $H_{\beta_{pyr}}$ ), 8.99 (dd,  $J$  = 68, 4.7 Hz, 2H,  $H_{\beta_{pyr}}$ ), 8.96 (dd,  $J$  = 63, 4.7 Hz, 2H,  $H_{\beta_{pyr}}$ ), 8.85 (d,  $J$  = 8.5 Hz, 2H,  $H_{Ar_{meso}}$ ), 8.83 (dd,  $J$  = 68, 4.7 Hz, 2H,  $H_{\beta_{pyr}}$ ), 7.94 (d,  $J$  = 7.4 Hz, 2H,  $H_{Ar_{meso}}$ ), 7.86 (td,  $J$  = 8.2, 1.6 Hz, 2H,  $H_{Ar_{meso}}$ ), 7.51 (t,  $J$  = 7.2 Hz, 2H,  $H_{Ar_{meso}}$ ), 7.49 (d,  $J$  = 7.2 Hz, 2H,  $H_{Ar_{strap}}$ ), 7.43 (s, 1H,  $H_{Ar_{m-OMe}}$ ), 7.37 (s, 1H,  $H_{Ar_{m-OMe}}$ ), 7.10 (s, 1H,  $H_{Ar_{m-OMe}}$ ), 6.91 (t,  $J$  = 7.7 Hz, 2H,  $H_{Ar_{strap}}$ ), 6.86 (t,  $J$  = 2.3 Hz, 1H,  $H_{Ar_{m-OMe}}$ ), 6.78 (t,  $J$  = 2.3 Hz, 1H,  $H_{Ar_{m-OMe}}$ ), 6.52 (d,  $J$  = 7.5 Hz, 2H,  $H_{Ar_{strap}}$ ), 5.12 (s, 2H,  $H_{Ar_{strap}}$ ), 3.93 (s, 3H,  $CH_3$ ), 3.89 (s, 3H,  $CH_3$ ), 3.83 (s, 3H,  $CH_3$ ), 3.82 (s, 3H,  $CH_3$ ), 1.64 (dd,  $J$  = 26.5, 12.9 Hz, 2H,  $CH_{2,benz}$ ), 1.19 – 1.07 (m, 2H,  $CH_{2,benz}$ ), 0.72 (m, 1H,  $CHCO$ ).  $^{205}Ti$  NMR (231 MHz,  $CDCl_3/CD_3OD$  9:1, DIPEA, 298 K):  $\delta$  2558 ppm. 2D HSQC NMR ( $\delta(^{13}C)$ ): 133.9 (2C), 133.6 (2C), 133.0 (2C), 132.0 (2C), 131.8 (2C), 130.9 (2C), 129.8 (2C), 128.4 (2C), 126.1 (2C), 123.8 (2C), 123.1 (2C), 120.6 (2C), 114.9, 114.0, 113.8, 113.6, 100.3, 99.9, 55.5 (4C) 39.7 (2C) ppm. UV-vis ( $CHCl_3/CH_3OH$  9:1, DIPEA):  $\lambda$  ( $\epsilon$ ,  $M^{-1}.cm^{-1}$ ) 436 ( $3.3 \times 10^6$ ), 564 ( $1.7 \times 10^4$ ), 605 ( $4.9 \times 10^3$ ) nm. HRMS (ESI):  $m/z$  calculated 1257.32832 for  $[M-H]^+ C_{66}H_{48}N_6O_8^{205}Ti$ , found 1257.3288 (0 ppm).

**$2^{Hg}_{Ti(II)}$** :  $^1H$  NMR (500 MHz,  $CDCl_3/CD_3OD$  9:1, DIPEA, 298 K):  $\delta$  9.01 (s, 2H,  $H_{\beta_{pyr}}$ ), 8.90 (d,  $J$  = 4.5 Hz, 2H,  $H_{\beta_{pyr}}$ ), 8.86 (d,  $J$  = 4.5 Hz, 2H,  $H_{\beta_{pyr}}$ ), 8.75 (s, 2H,  $H_{\beta_{pyr}}$ ), 8.64 (d,  $J$  = 8.4 Hz, 2H,  $H_{Ar_{meso}}$ ), 8.54 (d,  $J$  = 8.4 Hz, 2H,  $H_{Ar_{meso}}$ ), 8.18 (d,  $J$  = 7.4 Hz, 2H,  $H_{Ar_{meso}}$ ), 8.05 (d,  $J$  = 7.4 Hz, 2H,  $H_{Ar_{meso}}$ ), 7.83 (td,  $J$  = 8.3, 1.6 Hz, 2H,  $H_{Ar_{meso}}$ ), 7.77 (td,  $J$  = 8.0, 1.6 Hz, 2H,  $H_{Ar_{meso}}$ ), 7.58 (td,  $J$  = 7.6, 1.0 Hz, 2H,  $H_{Ar_{meso}}$ ), 7.50 (td,  $J$  = 7.6, 1.0 Hz, 2H,  $H_{Ar_{meso}}$ ), 7.25 (d,  $J$  = 7.7 Hz, 2H,  $H_{Ar_{strap}}$ ), 7.22 (d,  $J$  = 7.7 Hz, 2H,  $H_{Ar_{strap}}$ ), 6.84 (t,  $J$  = 7.5 Hz, 2H,  $H_{Ar_{strap}}$ ), 6.83 (t,  $J$  = 7.5 Hz, 2H,  $H_{Ar_{strap}}$ ), 6.63 (d,  $J$  = 7.7 Hz, 2H,  $H_{Ar_{strap}}$ ), 6.62 (d,  $J$  = 7.7 Hz, 2H,  $H_{Ar_{strap}}$ ), 5.44 (s, 2H,  $H_{Ar_{strap}}$ ), 5.33 (s, 2H,  $H_{Ar_{strap}}$ ), 1.89 (m, 4H,  $CH_{2,benz}$ ), 1.44 (m, 4H,  $CH_{2,benz}$ ),

1.16 (m, 2H, CHCO).  $^{205}\text{Tl}$  NMR (231 MHz,  $\text{CDCl}_3/\text{CD}_3\text{OD}$  9:1, DIPEA, 298 K):  $\delta$  895 ppm. 2D HSQC NMR  $\delta(^{13}\text{C})$ : 135.3 (2C), 134.9 (2C), 133.5 (2C), 133.3 (2C), 132.7 (2C), 132.6 (2C), 131.5 (4C), 129.3 (2C), 129.2 (2C), 128.0 (4C), 125.6 (4C), 124.9 (2C), 124.7 (2C), 123.5 (4C), 122.0 (2C), 121.9 (2C), 52.9 (2C), 39.4 (4C) ppm. UV-vis ( $\text{CHCl}_3/\text{CH}_3\text{OH}$  9:1, DIPEA):  $\lambda$  464, 588, 635 nm. HRMS (ESI) : m/z calculated 1661.35205 for  $[\text{M}]^- \text{C}_{80}\text{H}_{54}\text{N}_8\text{O}_8^{-202}\text{Hg}^{205}\text{Tl}$ , found 1661.3527 (0 ppm).

#### Crystal data for complex **1**<sup>Tl(III)</sup>

$\text{C}_{66}\text{H}_{49}\text{N}_6\text{O}_8\text{Tl}$ ;  $M = 1258.48$ . APEXII, Bruker-AXS diffractometer, Mo-K $\alpha$  radiation ( $\lambda = 0.71073 \text{ \AA}$ ),  $T = 150(2) \text{ K}$ ; Monoclinic  $P 1 2_1/n 1$ ,  $a = 14.4652(8)$ ,  $b = 17.5010(10)$ ,  $c = 23.3205(14) \text{ \AA}$ ,  $\beta = 91.874(2)^\circ$ ,  $V = 5900.6(6) \text{ \AA}^3$ .  $Z = 4$ ,  $d = 1.417 \text{ g.cm}^{-3}$ ,  $\mu = 2.798 \text{ mm}^{-1}$ . The structure was solved by direct methods using the *SIR97* program,<sup>[5]</sup> and then refined with full-matrix least-square methods based on  $F^2$  (*SHELXL-97*).<sup>[6]</sup> The contribution of the disordered solvents to the calculated structure factors was estimated following the *BYPASS* algorithm,<sup>[7]</sup> implemented as the *SQUEEZE* option in *PLATON*.<sup>[8]</sup> A new data set, free of solvent contribution, was then used in the final refinement. All non-hydrogen atoms were refined with anisotropic atomic displacement parameters. H atoms were finally included in their calculated positions. A final refinement on  $F^2$  with 13504 unique intensities and 734 parameters converged at  $\omega R(F^2) = 0.1188$  ( $R(F) = 0.0515$ ) for 8250 observed reflections with  $I > 2\sigma(I)$ . CCDC 1422859.

[5] A. Altomare, M. C. Burla, M. Camalli, G. Cascarano, C. Giacovazzo, A. Guagliardi, A. G. G. Moliterni, G. Polidori and R. Spagna, *J. Appl. Crystallogr.*, 1999, **32**, 115-119.

[6] G. M. Sheldrick, *Acta Crystallogr.*, 2008, **A64**, 112-122.

[7] P. van der Sluis and A. L. Spek, *Acta Crystallogr.*, 1990, **A46**, 194-201.

[8] A. L. Spek, *J. Appl. Crystallogr.*, 2003, **36**, 7-13.

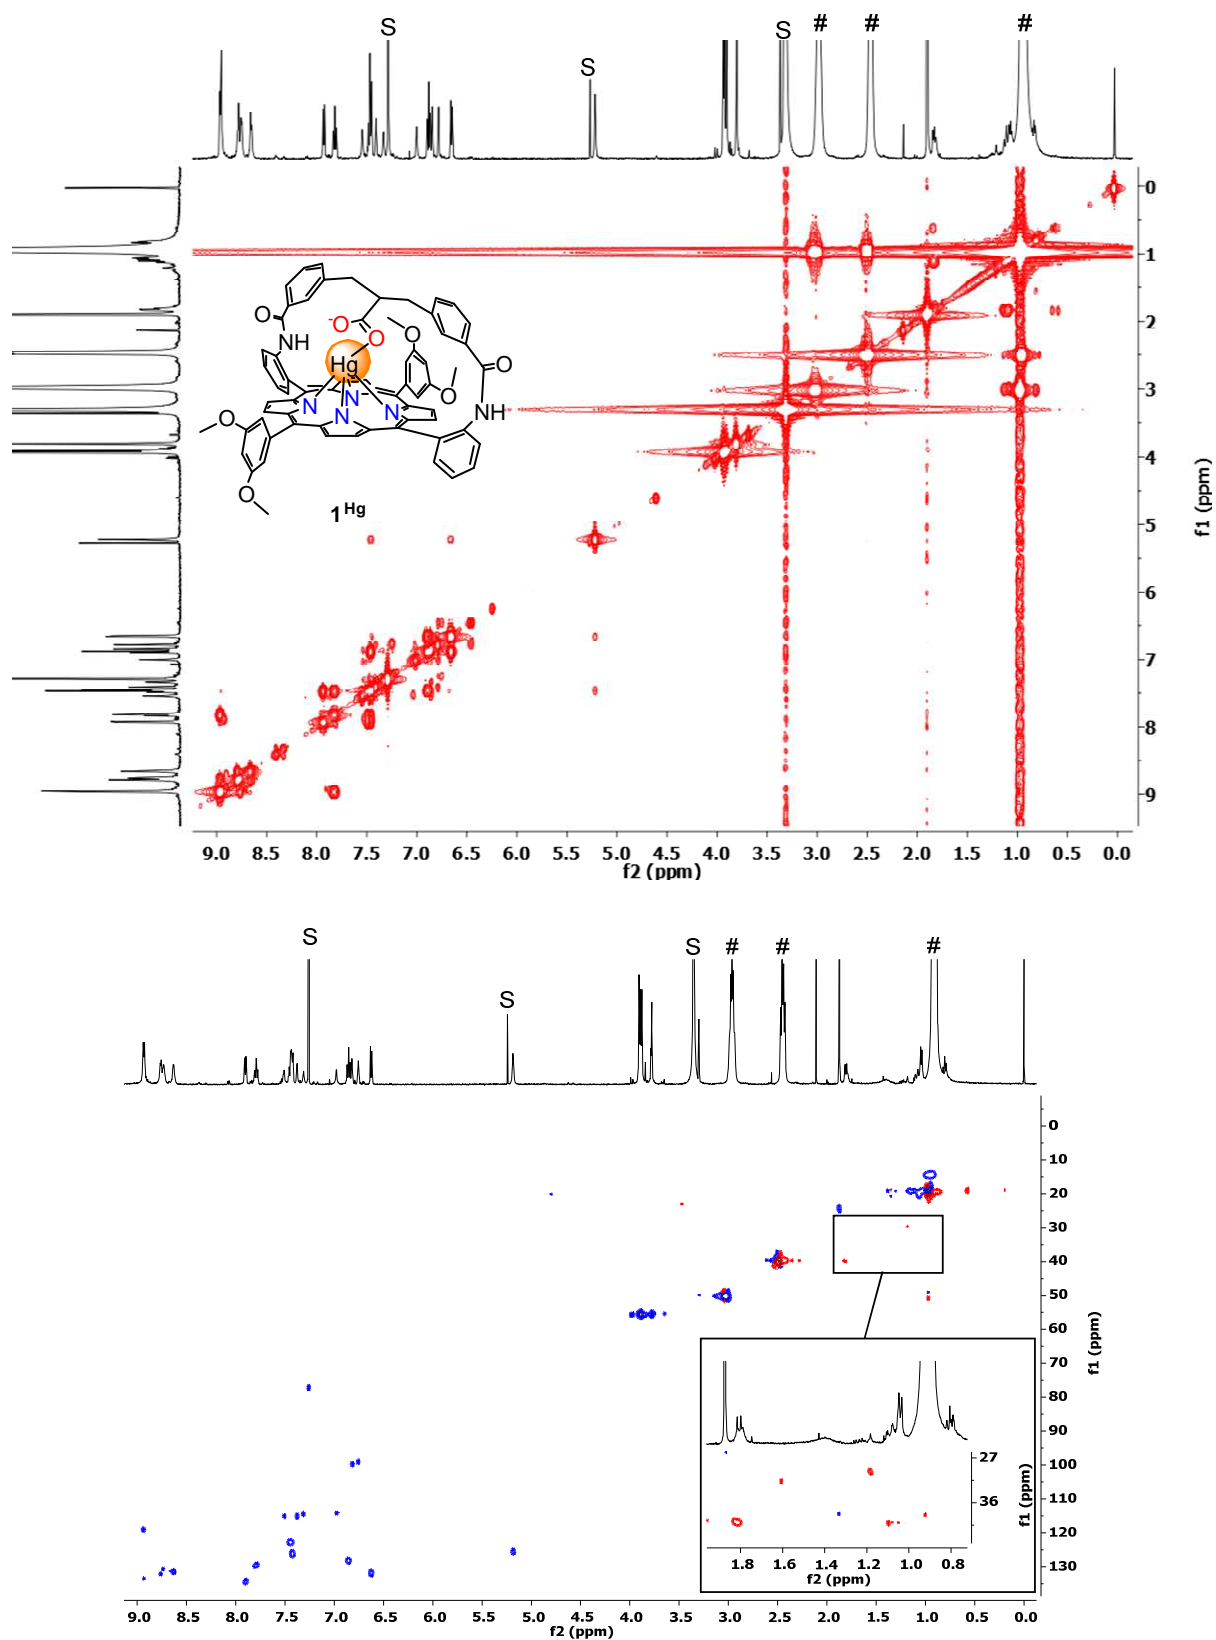

**Figure S1.** 2D COSY (top) and HSQC (bottom) NMR spectra of **1<sup>Hg</sup>** in CDCl<sub>3</sub>/CD<sub>3</sub>OD (9:1) with 10 equiv. of DIPEA at 298 K, (400 MHz). S = solvents, # = DIPEA.

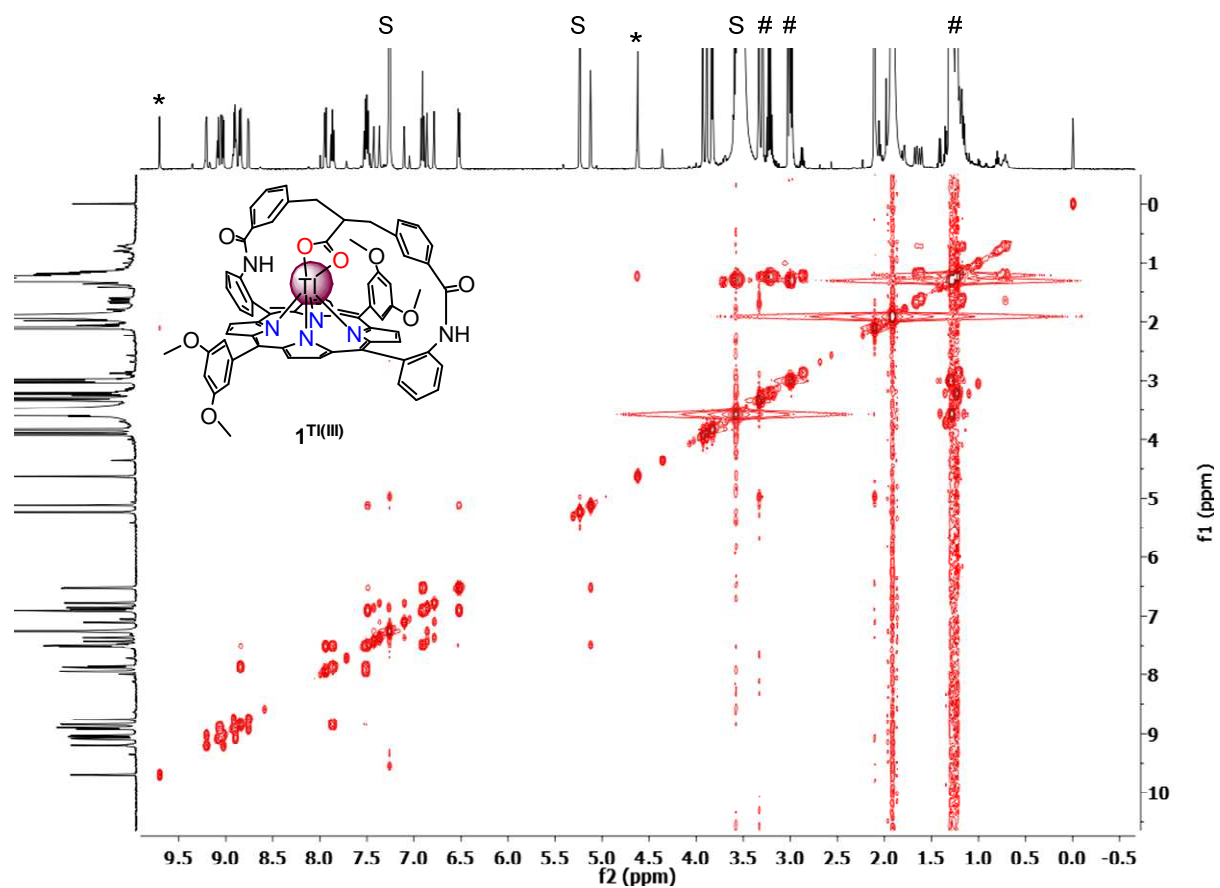

**Figure S2.** 2D COSY NMR spectrum of  $1^{Ti(III)}$  in  $CDCl_3/CD_3OD$  (9:1) with 10 equiv. of DIPEA at 298 K (400 MHz). S = solvents, \* = impurities, # = DIPEA.

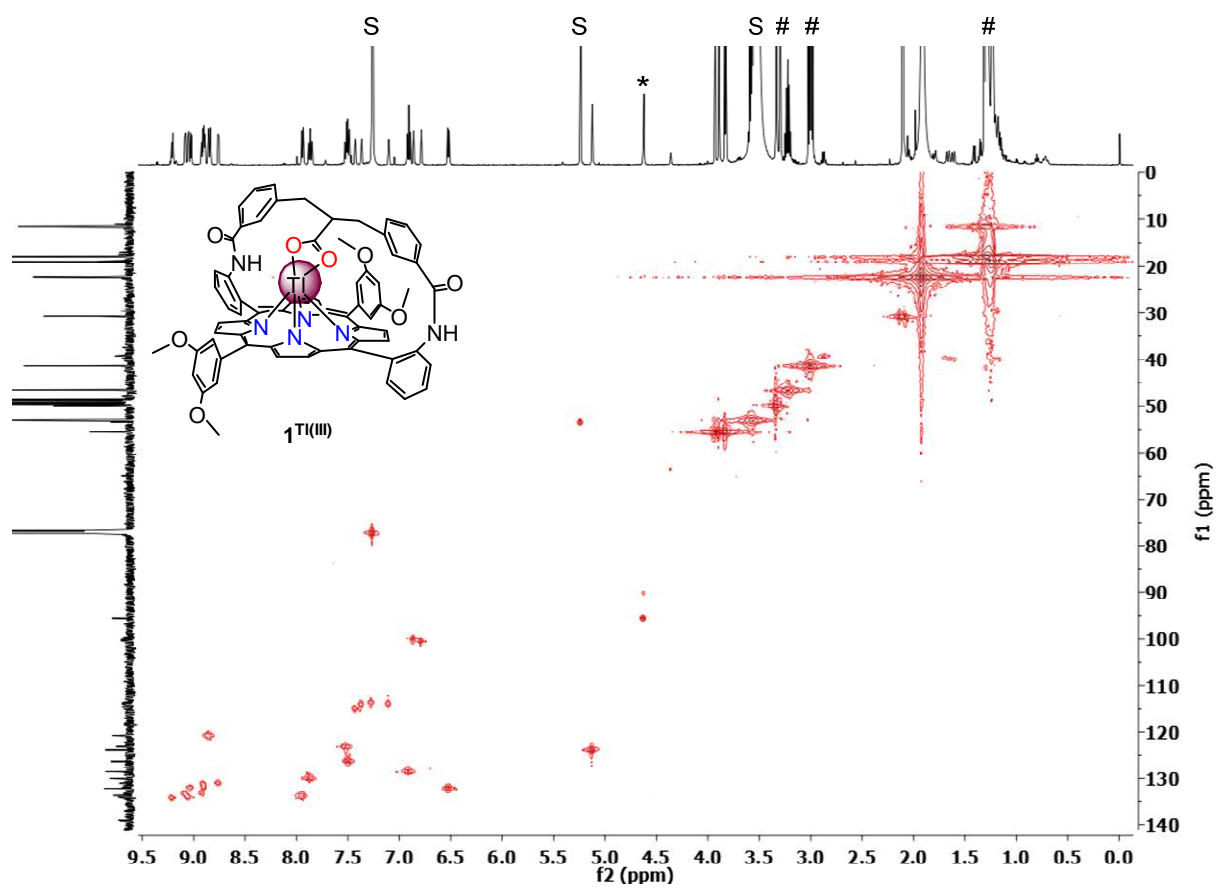

**Figure S3.** 2D HSQC NMR spectrum of **1**<sup>Ti(III)</sup> in CDCl<sub>3</sub>/CD<sub>3</sub>OD (9:1) with 10 equiv. of DIPEA at 298 K (500 MHz). S = solvents, \* = impurity, # = DIPEA.



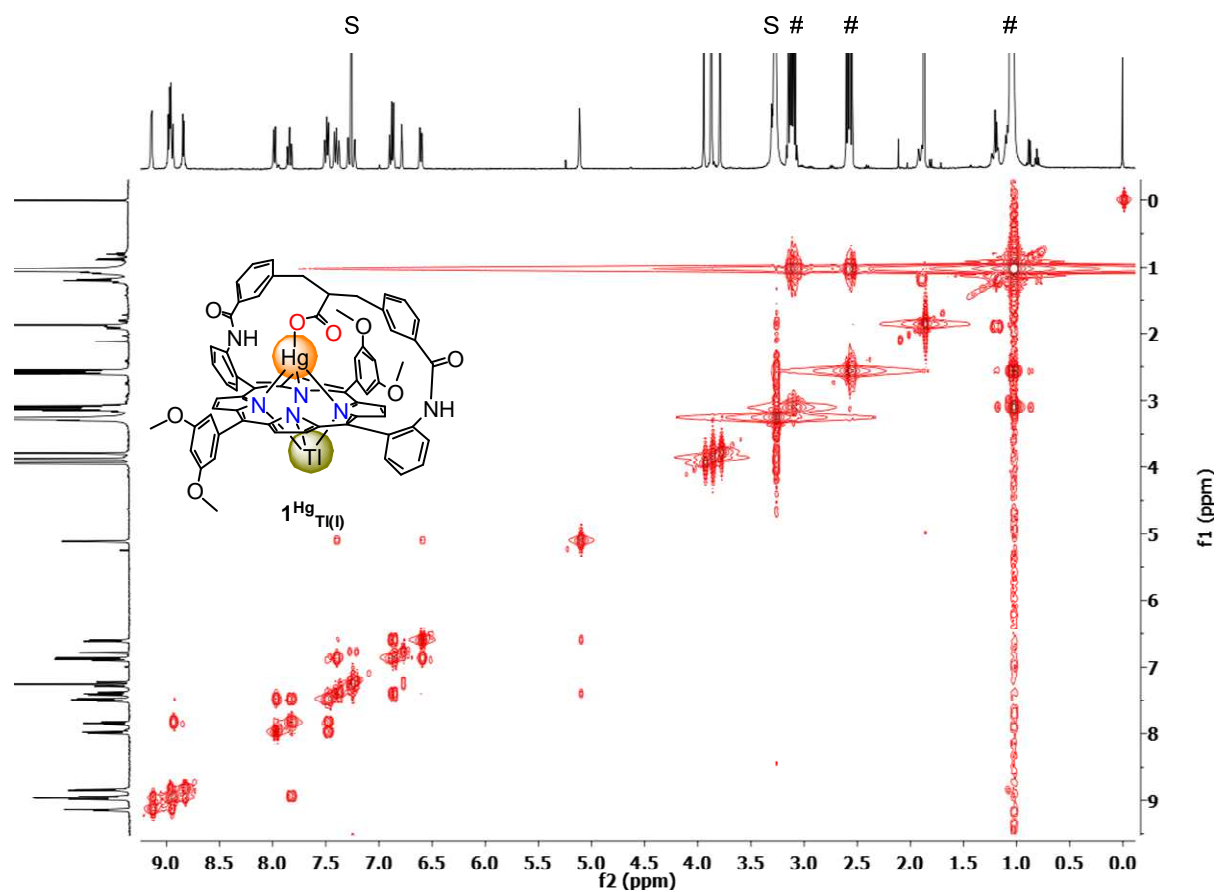

**Figure S4.** 2D COSY NMR spectrum of  $1^{\text{Hg}}_{\text{Tl(I)}}$  in  $\text{CDCl}_3/\text{CD}_3\text{OD}$  (9:1) with 10 equiv. of DIPEA at 298 K (400 MHz). S = solvents, # = DIPEA.

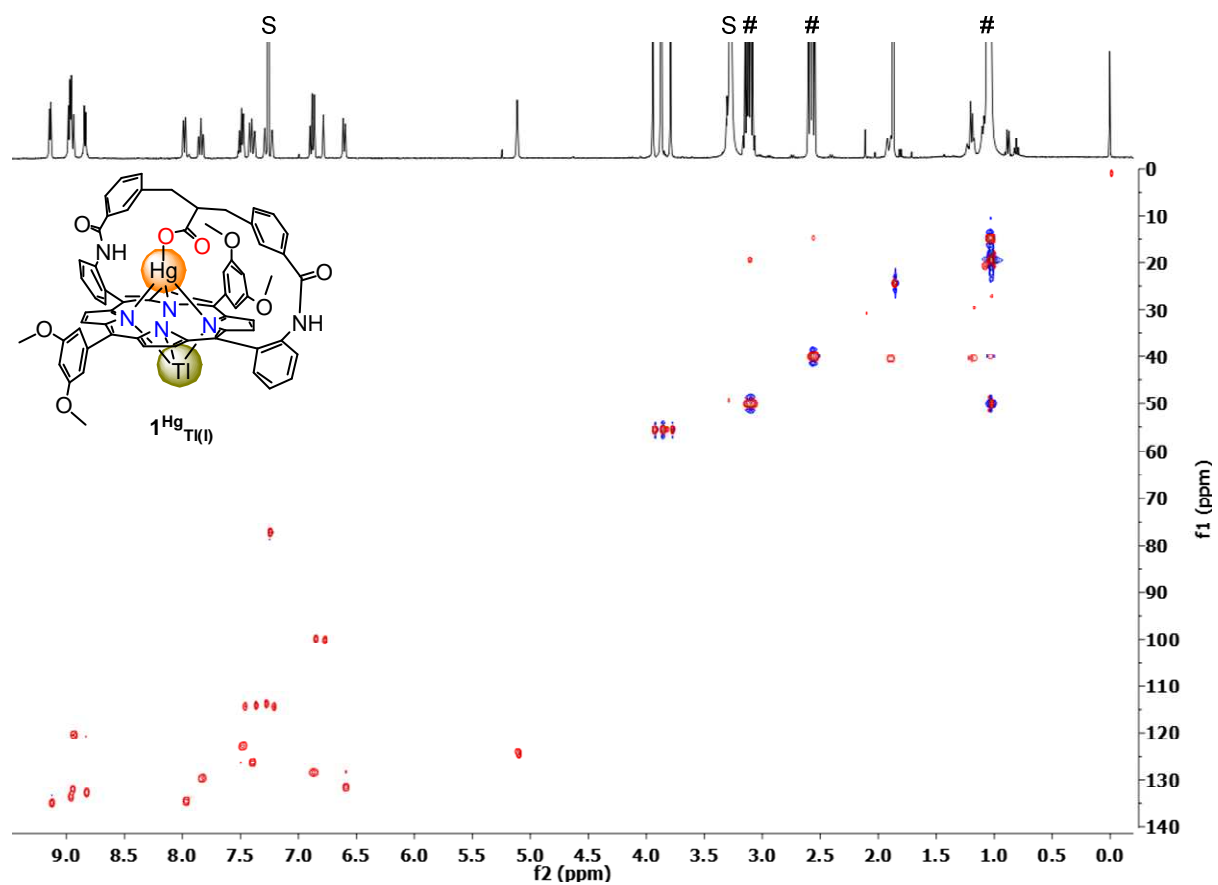

**Figure S5.** 2D HSQC NMR spectrum of **1**<sup>Hg</sup><sub>Tl(I)</sub> in CDCl<sub>3</sub>/CD<sub>3</sub>OD (9:1) with 10 equiv. of DIPEA at 298 K (400 MHz). S = solvents, # = DIPEA.

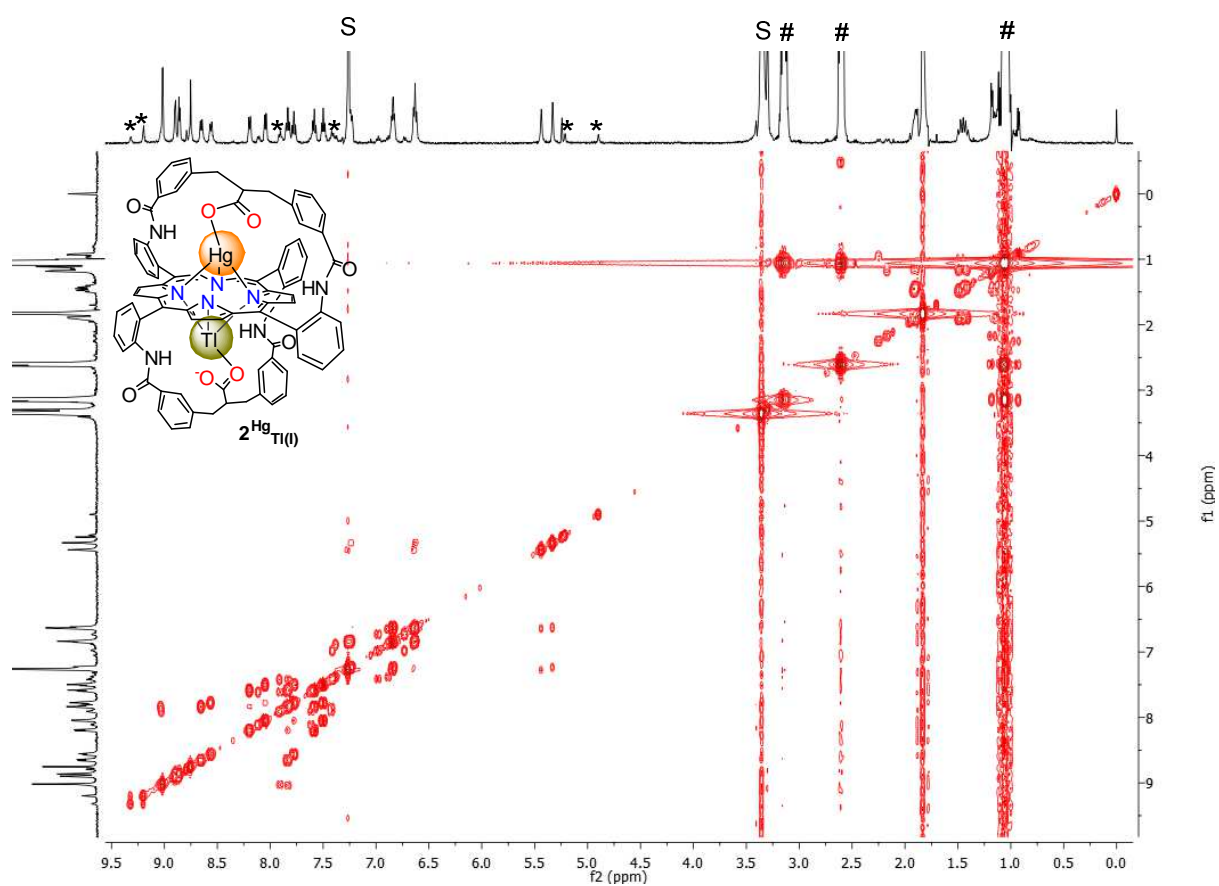

**Figure S6.** 2D COSY NMR spectrum of  $2^{\text{Hg}}_{\text{Tl(I)}}$  in  $\text{CDCl}_3/\text{CD}_3\text{OD}$  (9:1) with 10 equiv. of DIPEA at 298 K (500 MHz). S = solvents, # = DIPEA, \* = trace of the bimetallic complex  $2\text{Hg}_2$ .<sup>[4]</sup>

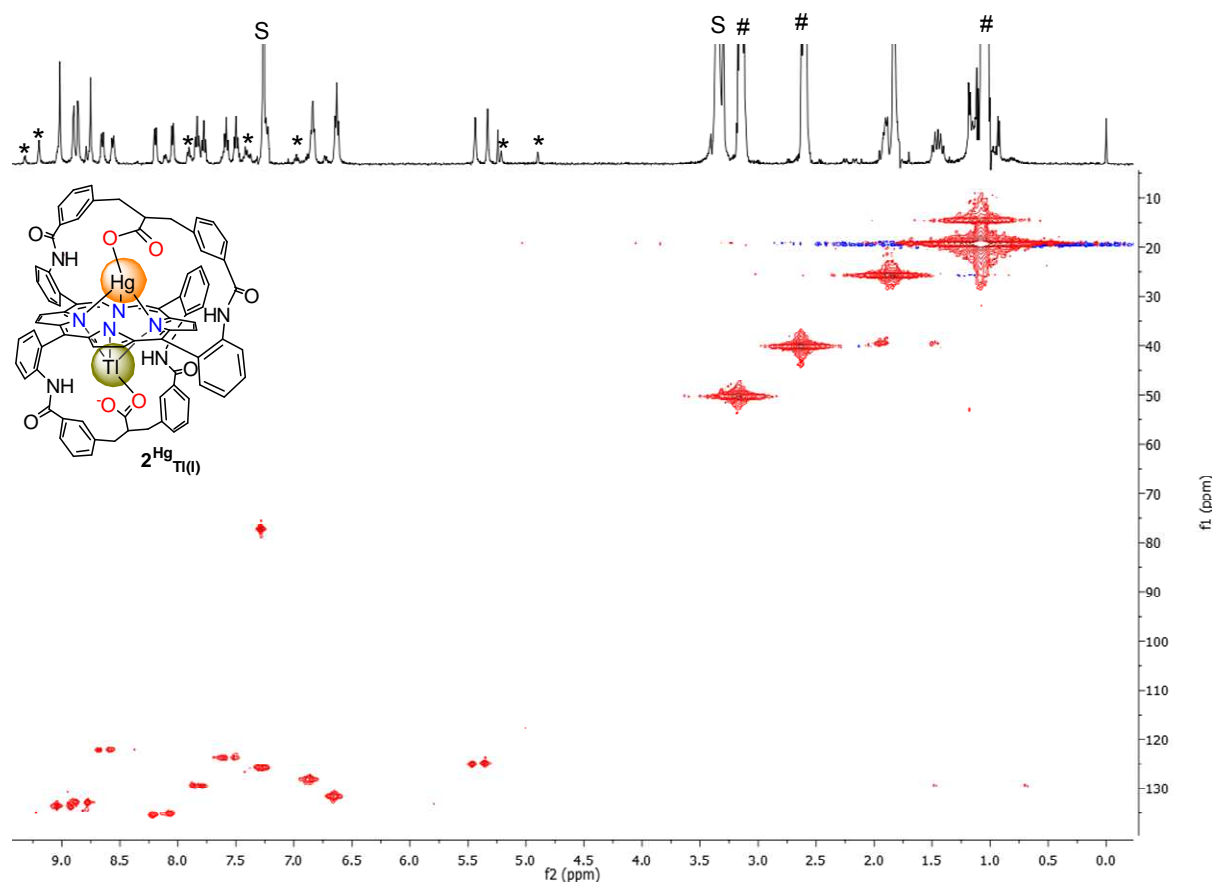

**Figure S7.** 2D HSQC NMR spectrum of  $2\text{Hg}_{\text{Tl(I)}}$  in  $\text{CDCl}_3/\text{CD}_3\text{OD}$  (9:1) with 10 equiv. of DIPEA at 298 K (500 MHz). S = solvents, # = DIPEA, \* = trace of the bimetallic complex  $2\text{Hg}_2$ .<sup>[4]</sup>

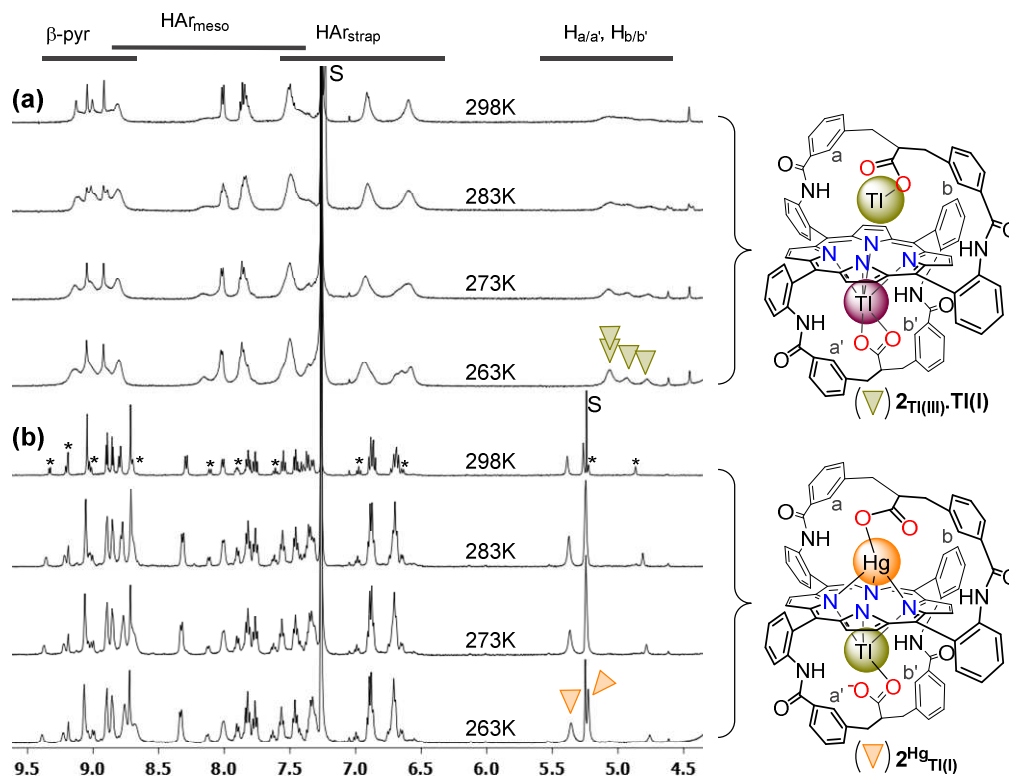

**Figure S8.** Comparison of the variable temperature  $^1\text{H}$  NMR profiles of (a)  $2_{\text{Tl(III)}}\cdot\text{Tl(I)}$  (disymmetric at 263 K) and (b)  $2^{\text{Hg}}_{\text{Tl(I)}}$  ( $\text{C}_2$ -symmetric at 263 K); conditions:  $\text{CDCl}_3/\text{CD}_3\text{OD}$  (9:1), 10 equiv. of DIPEA, 500 MHz. S = solvents, \* = trace of the bimetallic complex  $2\text{Hg}_2$ .<sup>[4]</sup>

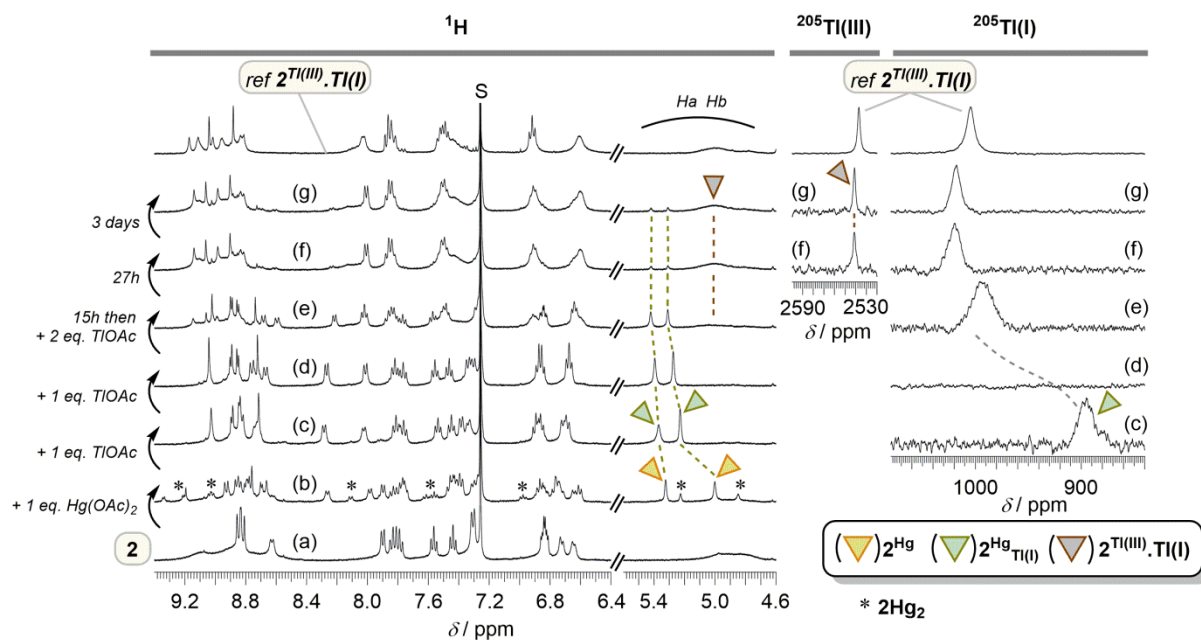

**Figure S9.** Formation and spontaneous evolution of  $2^{\text{Hg}}_{\text{Tl(I)}}$  monitored by  $^1\text{H}$  and  $^{205}\text{Tl}$  NMR spectroscopy ( $\text{CDCl}_3/\text{CD}_3\text{OD}$  9:1, 10 equiv. of DIPEA).  $2^{\text{Hg}}_{\text{Tl(I)}}$  was formed by the successive additions of  $\text{Hg}(\text{OAc})_2$  (a-b) and  $\text{TlOAc}$  (b-e), and was then allowed to stand in dark up to three days (d-g). S = solvent.

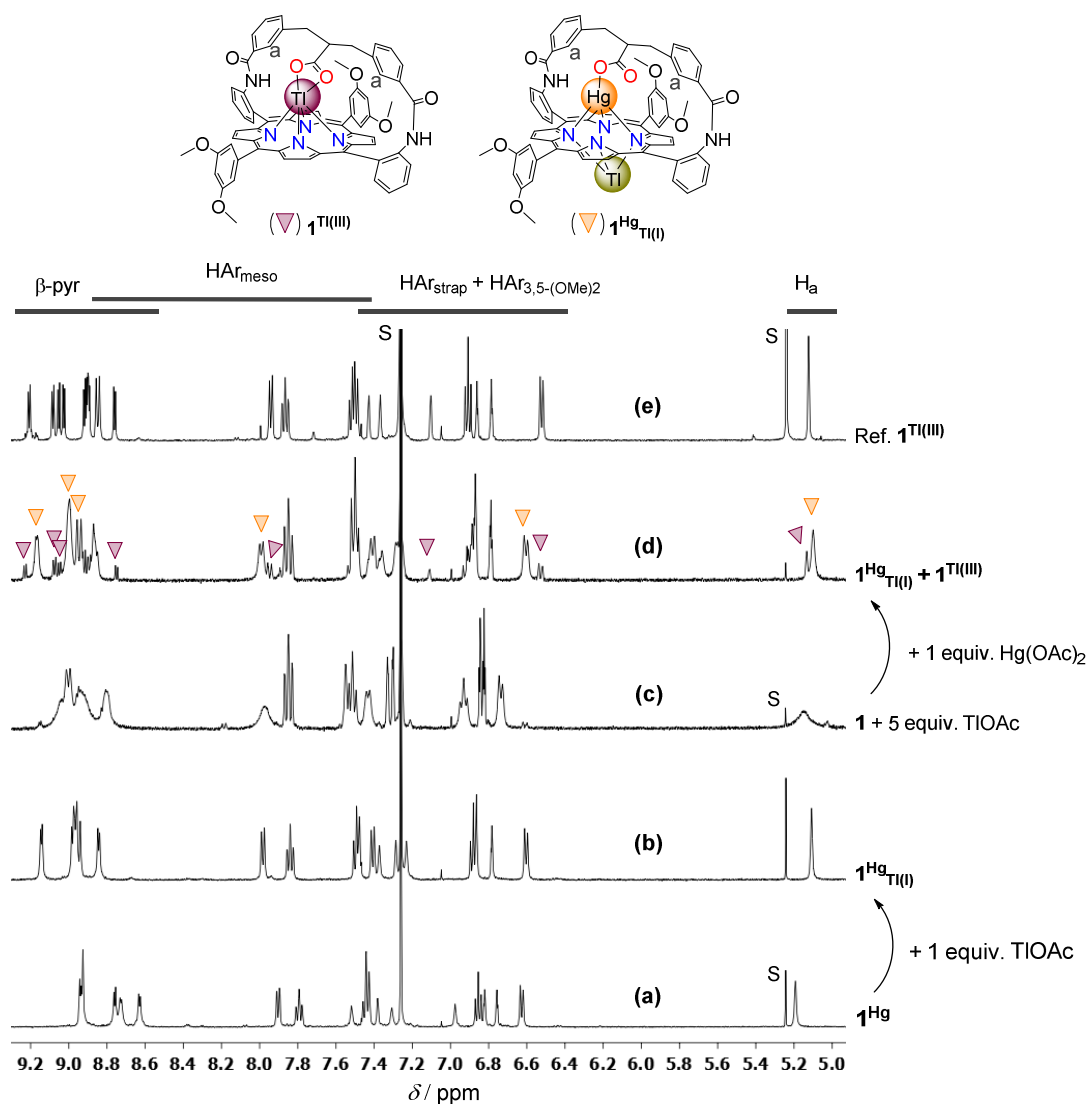

**Figure S10.** Influence of the order of introduction of TIOAc and Hg(OAc)<sub>2</sub> on the formation of **1**<sup>Hg<sub>Ti(I)</sub></sup> monitored by <sup>1</sup>H NMR spectroscopy: (a-b) spectrum of **1**<sup>Hg<sub>Ti(I)</sub></sup> obtained with a high selectivity by the successive addition of 1 equiv. of Hg(OAc)<sub>2</sub> and 1 equiv. of TIOAc to **1**; (c-d) spectra recorded after the successive addition of 5 equiv. of TIOAc and 1 equiv. of Hg(OAc)<sub>2</sub> to **1**, showing the presence of **1**<sup>Hg<sub>Ti(I)</sub></sup> and **1**<sup>Ti(III)</sup> in a *ca.* 5:1 initial ratio; e) spectrum of **1**<sup>Ti(III)</sup> obtained by the addition of 1 equiv. of Ti(OAc)<sub>3</sub> to **1**. Conditions: 400 MHz, CDCl<sub>3</sub>/CD<sub>3</sub>OD (9:1), 10 equiv. DIPEA, 298 K, obscurity. S = solvents.

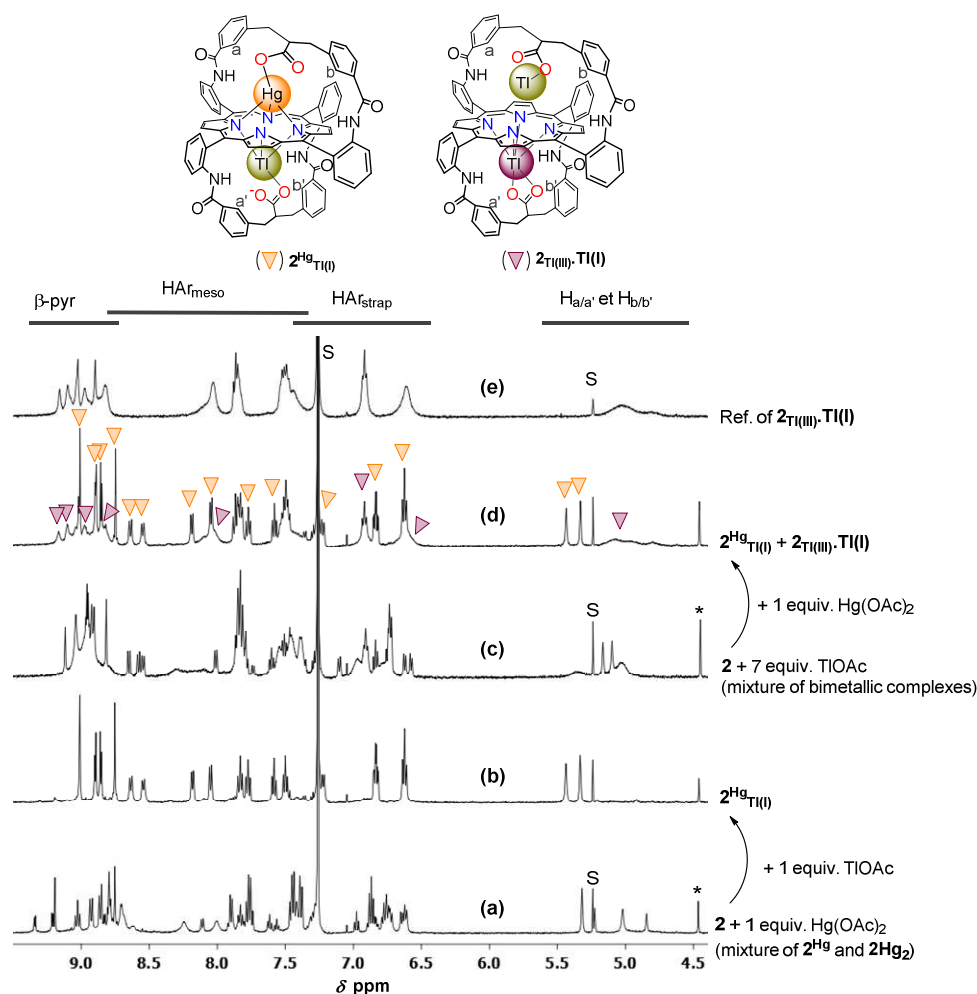

**Figure S11.** Influence of the order of introduction of TIOAc and Hg(OAc)<sub>2</sub> on the formation of  $2^{Hg}_{Tl(I)}$  monitored by <sup>1</sup>H NMR spectroscopy: (a-b) spectrum of  $2^{Hg}_{Tl(I)}$  obtained with a high selectivity by the successive addition of 1 equiv. of Hg(OAc)<sub>2</sub> and 1 equiv. of TIOAc to **2**; (c-d) spectra recorded after the successive addition of 7 equiv. of TIOAc and 1 equiv. of Hg(OAc)<sub>2</sub> to **2** showing, together with  $2^{Hg}_{Tl(I)}$ , the presence of  $2_{Tl(III)} \cdot Tl(I)$  in a significant amount; (e) <sup>1</sup>H NMR spectrum of  $2_{Tl(III)} \cdot Tl(I)$  obtained by the addition of 1 equiv. of Tl(OAc)<sub>3</sub> and 7 equiv. of TIOAc to **2**.<sup>[9]</sup> Conditions: 500 MHz, CDCl<sub>3</sub>/CD<sub>3</sub>OD (9:1), 10 equiv. DIPEA, 298 K, obscurity. S = solvents, \* = impurity.

[9] V. Ndoyom, L. Fusaro, V. Dorcet, B. Boitrel and S. Le Gac, *Angew. Chem. Int. Ed.*, 2015, **54**, 3806-3811.



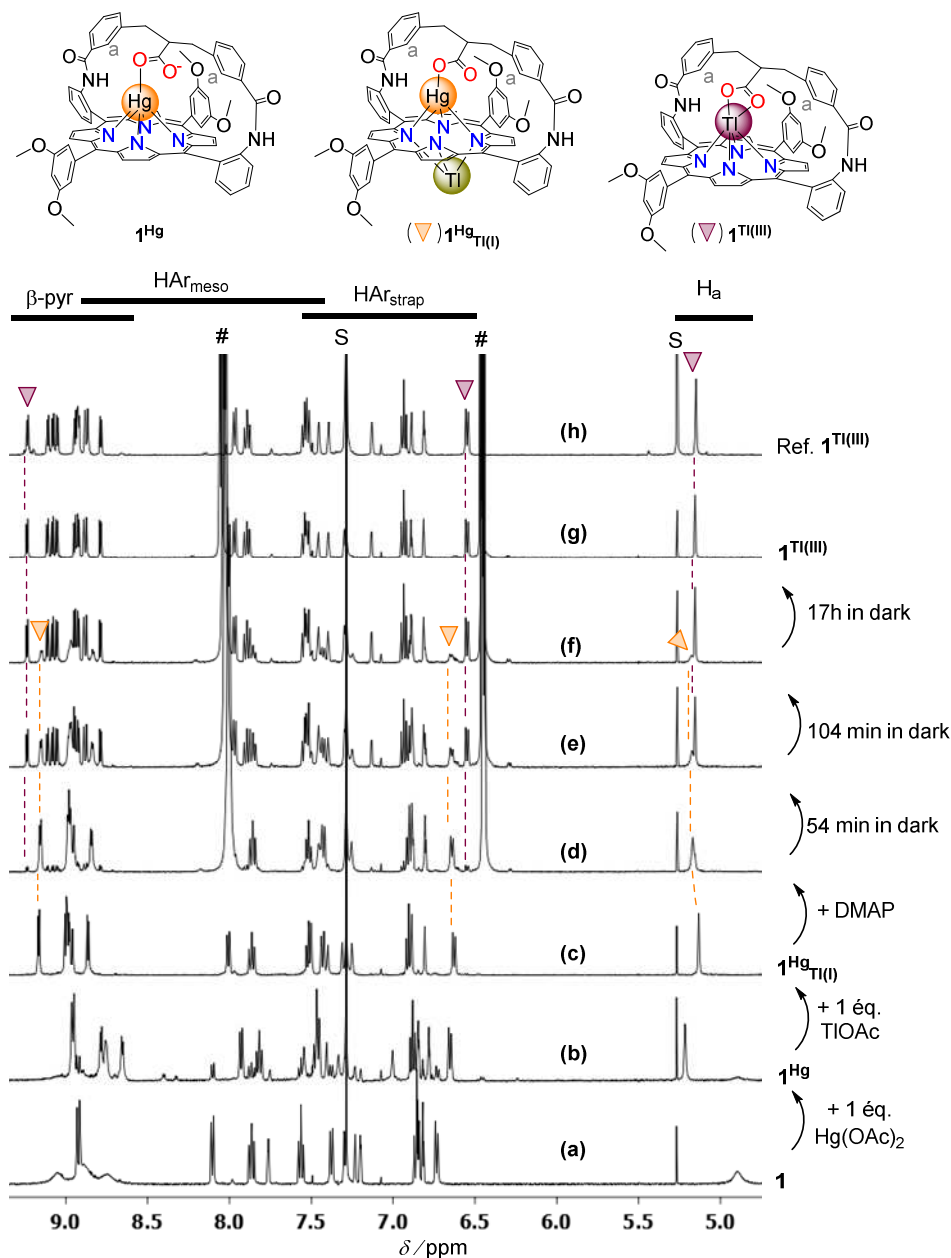

**Figure S12.**  $^1H$  NMR monitoring of the spontaneous transformation  $1^{Hg_{Tl(I)}} \rightarrow 1^{Tl(III)}$  in the presence of 11 equiv. of DMAP (d-g); (h)  $^1H$  NMR spectrum of  $1^{Tl(III)}$  obtained by the addition of 1.5 equiv. of  $Tl(OAc)_3$  to **1**. Conditions: 500 MHz,  $CDCl_3/CD_3OD$  (9:1), 10 equiv. DIPEA, obscurity, 298 K. S = solvents, # = DMAP.

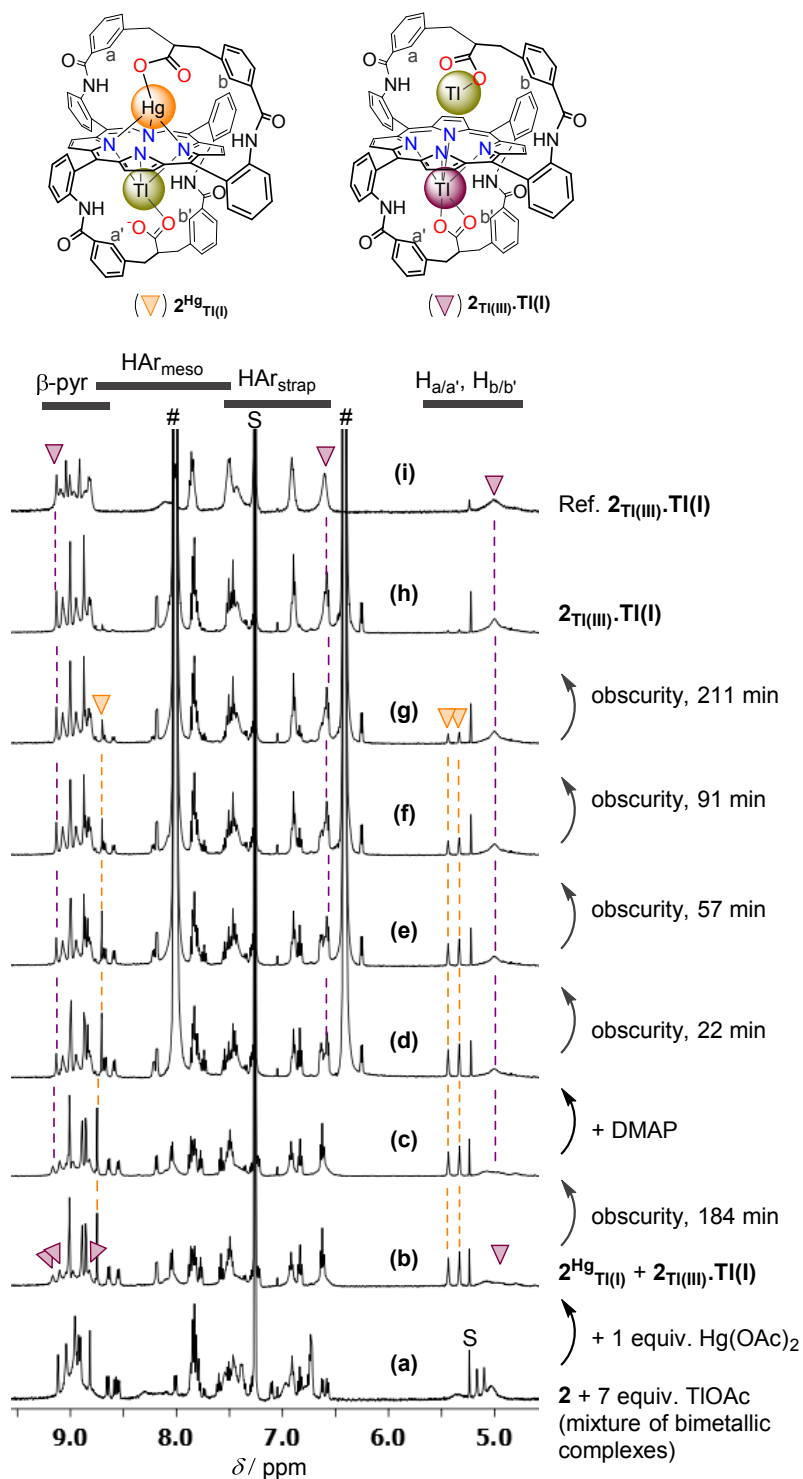

**Figure S13.**  $^1\text{H}$  NMR monitoring of the spontaneous transformation  $2^{\text{Hg}}_{\text{Tl(I)}} \rightarrow 2_{\text{Tl(III)}}\cdot\text{TI(I)}$  without (b-c) or with 80 equiv. of DMAP (d-h); (i)  $^1\text{H}$  NMR spectrum of  $2_{\text{Tl(III)}}\cdot\text{TI(I)}$  obtained by the addition of 1 equiv. of  $\text{TI}(\text{OAc})_3$  and 7 equiv. of TIOAc to **2**.<sup>[9]</sup> Conditions: 500 MHz,  $\text{CDCl}_3/\text{CD}_3\text{OD}$  (9:1), 10 equiv. DIPEA, 298 K, obscuring. S = solvents, # = DMAP.

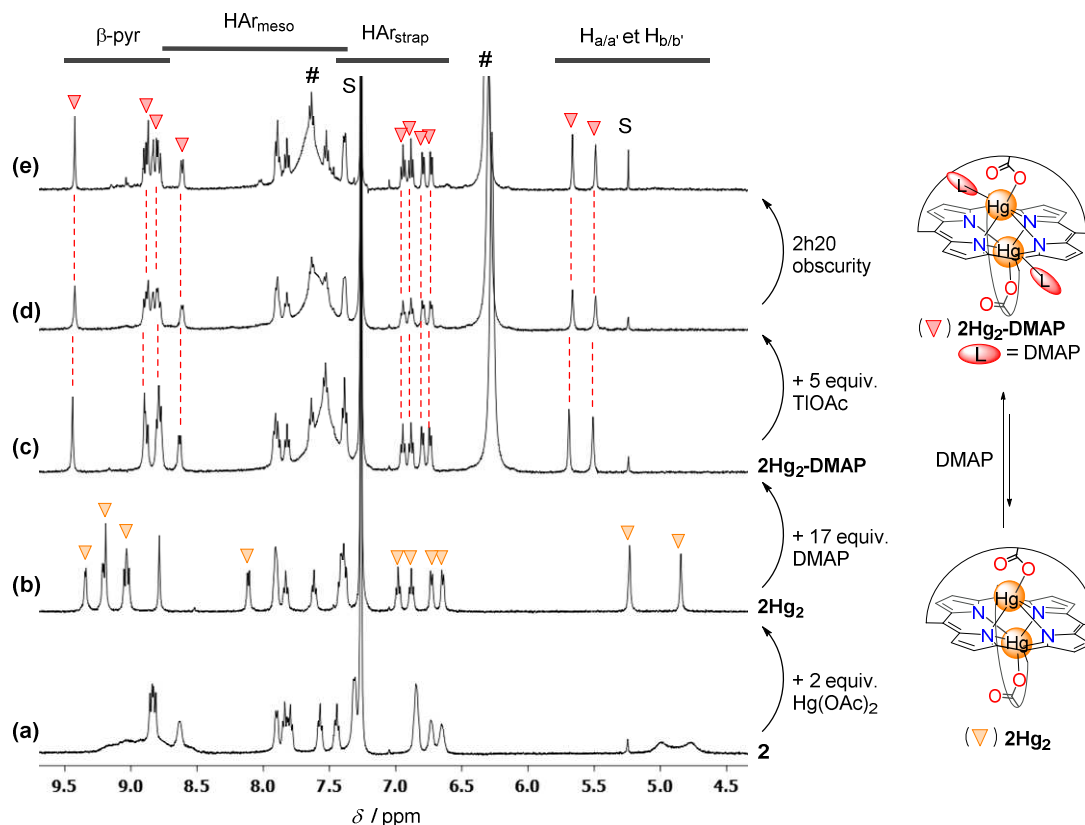

**Figure S14.**  $^1\text{H}$  NMR experiment related to the Tl(I)-to-Tl(III) oxidation process, attempted with an excess of  $\text{Hg}(\text{OAc})_2$ : (a-c)  $^1\text{H}$  NMR spectra of the bimetallic complexes  $2\text{Hg}_2$  and  $2\text{Hg}_2\text{-DMAP}$  formed by the successive addition of 2 equiv. of  $\text{Hg}(\text{OAc})_2$  and 17 equiv. of DMAP to **2**; <sup>[4]</sup> absence of evolution of the solution upon the further addition of 5 equiv. of TIOAc (d-e). Conditions: 500 MHz,  $\text{CDCl}_3/\text{CD}_3\text{OD}$  (9:1), 10 equiv. DIPEA, 298 K, obscurity. S = solvents, # = DMAP.

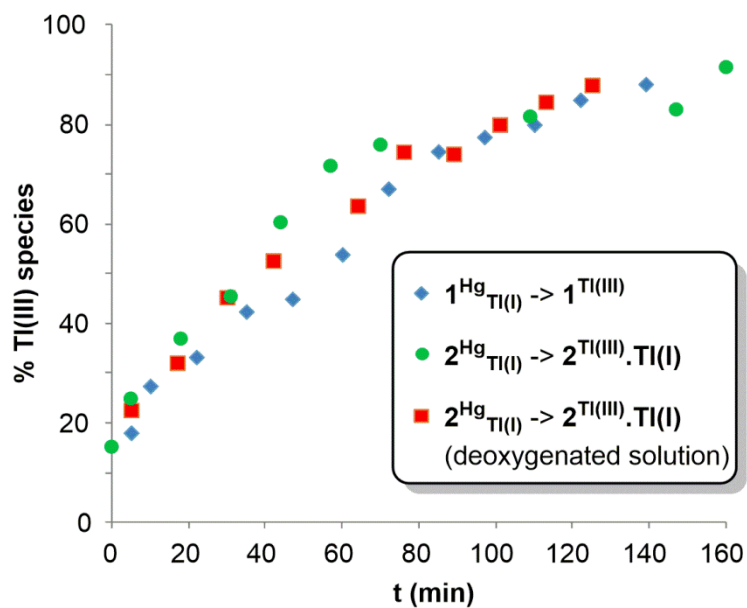

**Figure S15.**  $^1\text{H}$  NMR monitoring of the transformations  $1^{\text{Hg}}_{\text{Tl(I)}} \rightarrow 1^{\text{Tl(III)}}$  and  $2^{\text{Hg}}_{\text{Tl(I)}} \rightarrow 2^{\text{Tl(III)}} \cdot \text{Tl(I)}$  carried out at ambient atmosphere or in deoxygenated solvents. Conditions: 500 MHz,  $\text{CDCl}_3/\text{CD}_3\text{OD}$  (9:1), 10 equiv. DIPEA, *ca.* 35 equiv. DMAP, 298 K, obscurity. The percentages of Tl(III) species were determined from integration of appropriate signals vs. an internal reference (error  $\pm 5\%$ ).

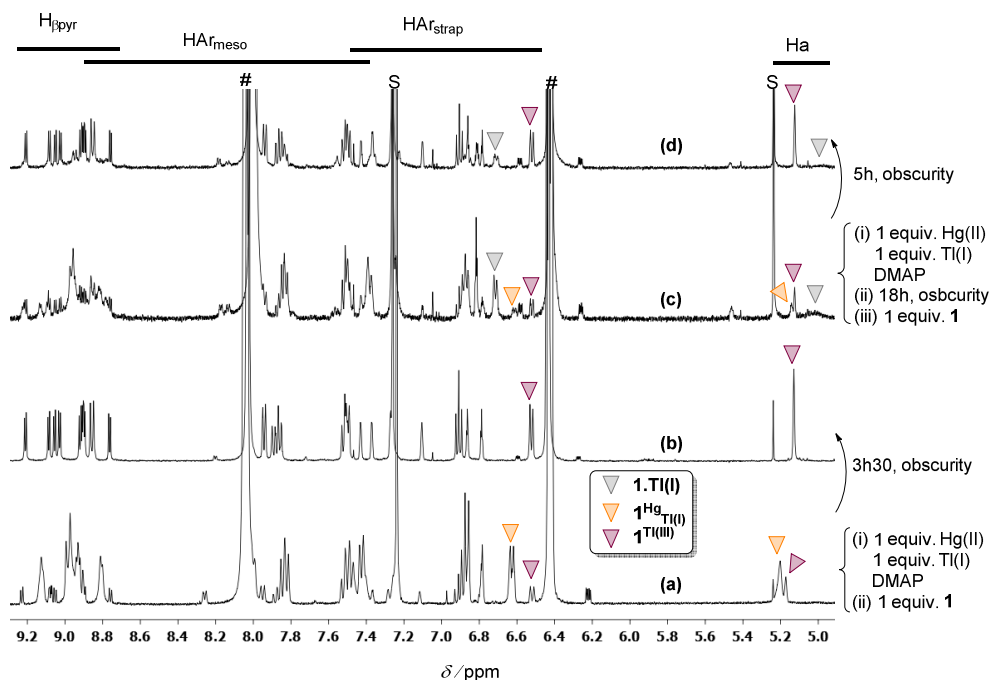

**Figure S16.**  $^1\text{H}$  NMR experiments related to the Tl(I)-to-Tl(III) oxidation process attempted without porphyrin (c-d) (a-b is a reference experiment). Conditions: 500 MHz,  $\text{CDCl}_3/\text{CD}_3\text{OD}$  (9:1), 10 equiv. DIPEA, 298 K, obscurity. S = solvents, # = DMAP.

- (a-b) The successive addition of  $\text{Hg}(\text{OAc})_2$ , TIOAc, DMAP and **1**, led to spectrum (a) recorded immediately. A *ca.* 5:1 initial ratio of  $1^{\text{HgTl(I)}}$  and  $1^{\text{Tl(III)}}$  is observed (see text and Figure S10). Upon standing 3h30 in dark,  $1^{\text{Tl(III)}}$  is obtained quantitatively (b).
- (c-d) The successive addition of  $\text{Hg}(\text{OAc})_2$ , TIOAc and DMAP led, upon standing 18h in dark and subsequent addition of **1**, to spectrum (c), showing that  $1^{\text{Tl(I)}}$  is the major species while  $1^{\text{Tl(III)}}$  is the minor one.  $1^{\text{Tl(III)}}$  is likely formed when **1** is added and not during the 18 hours in the absence of **1** (deduced from comparison with spectrum (a)); spectrum (d) was recorded upon standing 5h in dark, showing  $1^{\text{Tl(III)}}$  as a major species.

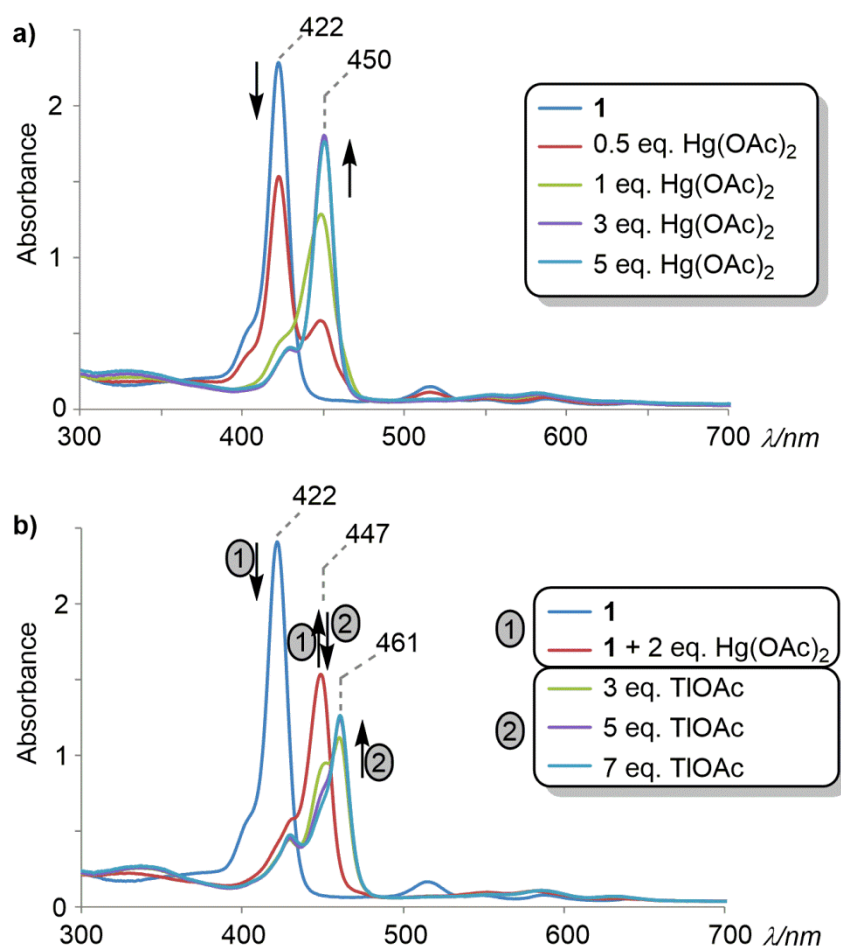

**Figure S17.** Monitoring of the metallation of **1** with Hg(II) and Tl(I) by UV-vis absorption spectroscopy: (a) titration of **1** with  $\text{Hg}(\text{OAc})_2$  (the Soret band at 450 nm corresponds to dinuclear species, see ref [4] and [10]); (b) successive addition of  $\text{Hg}(\text{OAc})_2$  and TIOAc to **1**. Conditions:  $\text{CHCl}_3/\text{CH}_3\text{OH}$  (9:1), 10 equiv. DIPEA, obscurity.

[10] (a) M. F. Hudson and K. M. Smith, *Tetrahedron Lett.*, 1974, **26**, 2223-2226; (b) M. F. Hudson and K. M. Smith, *Tetrahedron Lett.*, 1974, **26**, 2227-2230.

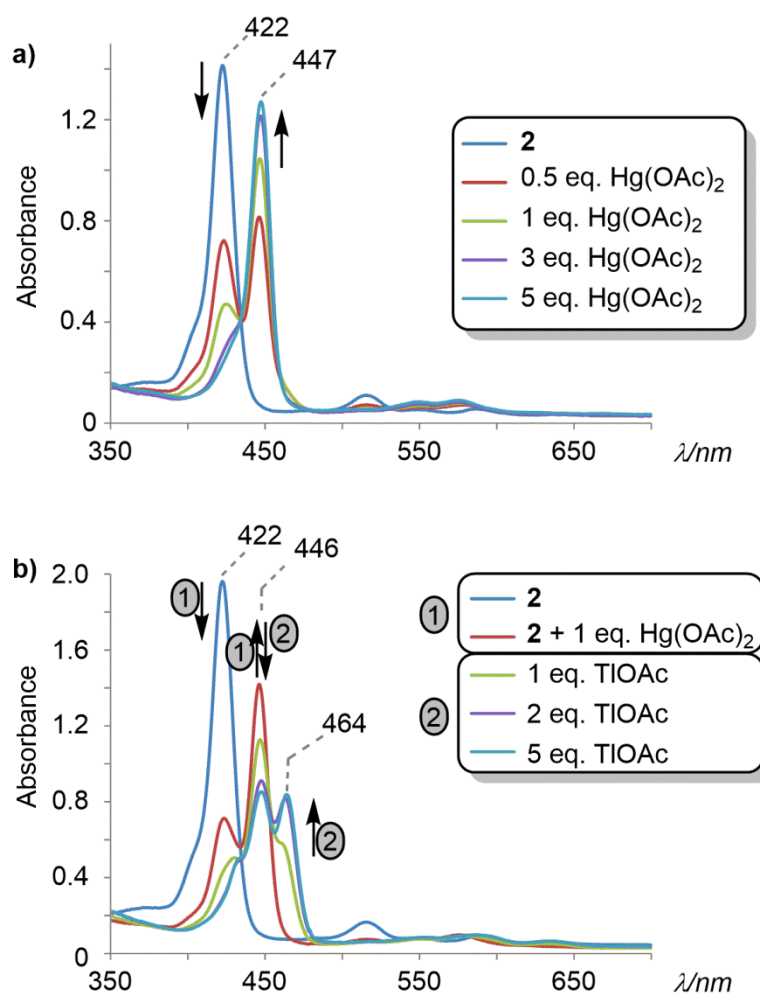

**Figure S18.** Monitoring of the metallation of **2** with  $\text{Hg}(\text{II})$  and  $\text{Tl}(\text{I})$  by UV-vis absorption spectroscopy: (a) titration of **2** with  $\text{Hg}(\text{OAc})_2$  (the Soret band at 447 nm corresponds to dinuclear species, see ref [4] and [10]); (b) successive addition of  $\text{Hg}(\text{OAc})_2$  and TIOAc to **2**. Conditions:  $\text{CHCl}_3/\text{CH}_3\text{OH}$  (9:1), 10 equiv. DIPEA, obscurity.

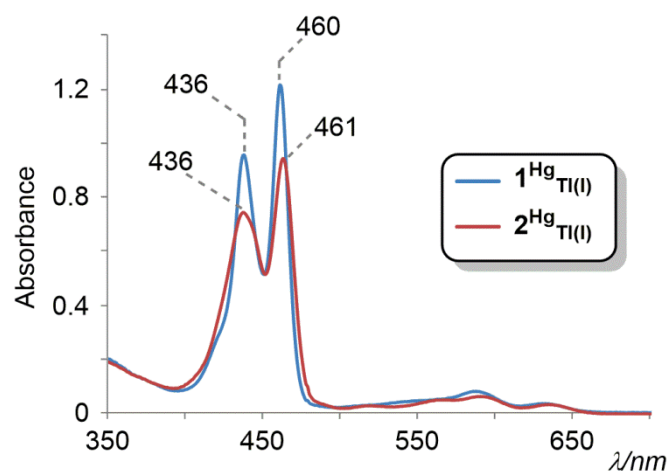

**Figure S19.** UV-vis absorption spectra of  $1^{\text{Hg}}_{\text{Tl(I)}}$  and  $2^{\text{Hg}}_{\text{Tl(I)}}$  obtained from a 1/500 dilution of NMR tube solutions containing exclusively these complexes. In both cases, an intense Soret band at 436 nm is observed, evidencing the formation of the corresponding Tl(III) species [ $1^{\text{Tl(III)}}$  and  $2_{\text{Tl(III)}}\cdot\text{Tl(I)}$ ] upon dilution. Conditions :  $\text{CHCl}_3/\text{CH}_3\text{OH}$  (9:1), 10 equiv. DIPEA, obscurity.
